# Supplementary material
Source: PubMed Central journal article supplement (PMC6625753)
Supplement: NIHMS1524458-supplement-1.pdf [file NIHMS1524458-supplement-1.pdf]

**Cell Reports, Volume 26**

## **Supplemental Information**

### **Modeling Patient-Derived Glioblastoma with Cerebral Organoids**

**Amanda Linkous, Demosthenes Balamatsias, Matija Snuderl, Lincoln Edwards, Ken Miyaguchi, Teresa Milner, Batsheva Reich, Leona Cohen-Gould, Andrew Storaska, Yasumi Nakayama, Emily Schenkein, Richa Singhania, Stefano Cirigliano, Tarig Magdeldin, Ying Lin, Gouri Nanjangud, Kalyani Chadalavada, David Pisapia, Conor Liston, and Howard A. Fine**

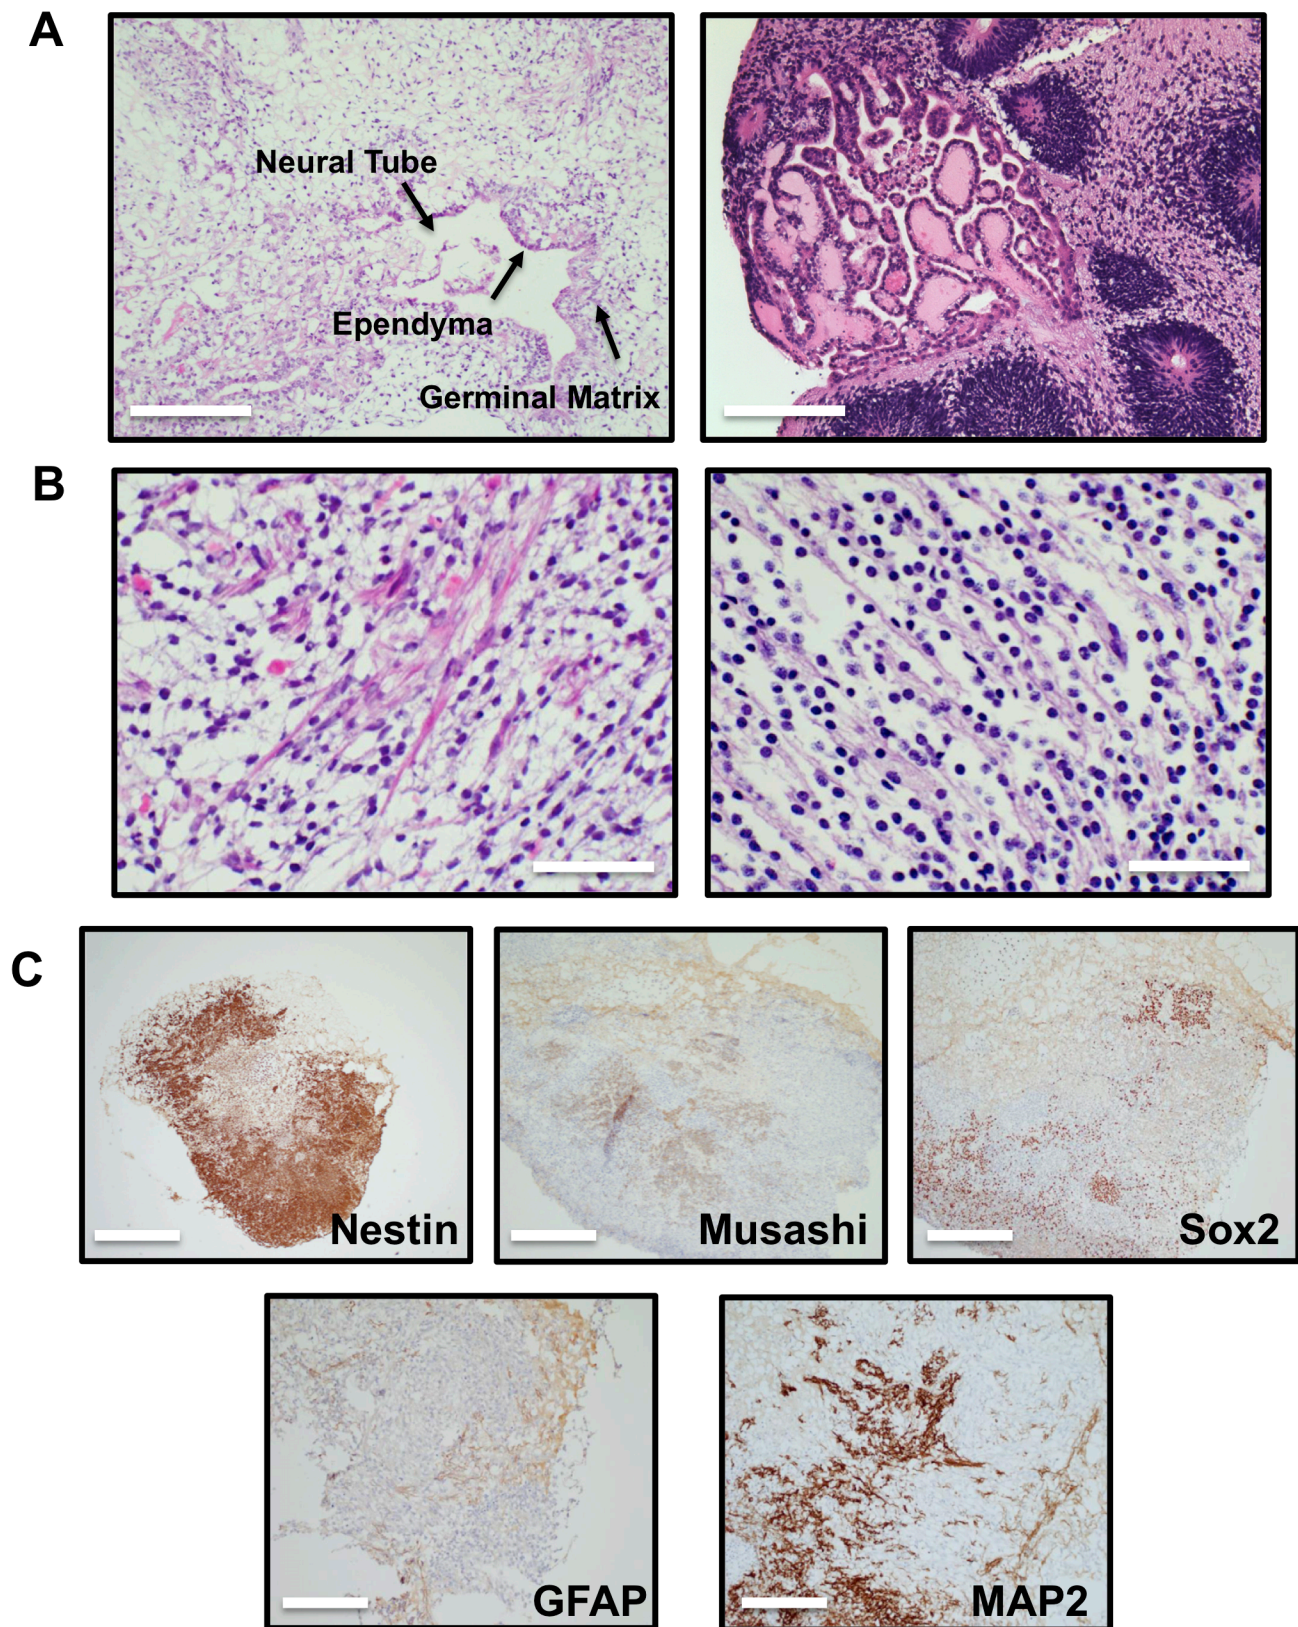

**Figure S1: Morphological and Immunohistochemical Analysis Reveals Neural Stem Cells and Lineage-Specific Differentiation in Cerebral Organoids, Related to Figure 1.** (A) H&E of normal cerebral organoids reveals the presence of a neural tube, ependyma, and germinal matrix (left) and choroid plexus (right); scale bar, 200  $\mu\text{m}$ . (B) Normal cerebral organoids (left) are morphologically similar to a fetal brain at 20 weeks of gestation (right); scale bar, 100  $\mu\text{m}$ . (C) Immunohistochemical staining of normal cerebral organoids for markers of neural stem cells (Nestin, Musashi, and Sox2), glial cells (GFAP), and neurons (MAP2); scale bar, 1000  $\mu\text{m}$ ; n= 4-6 organoids for all experiments.



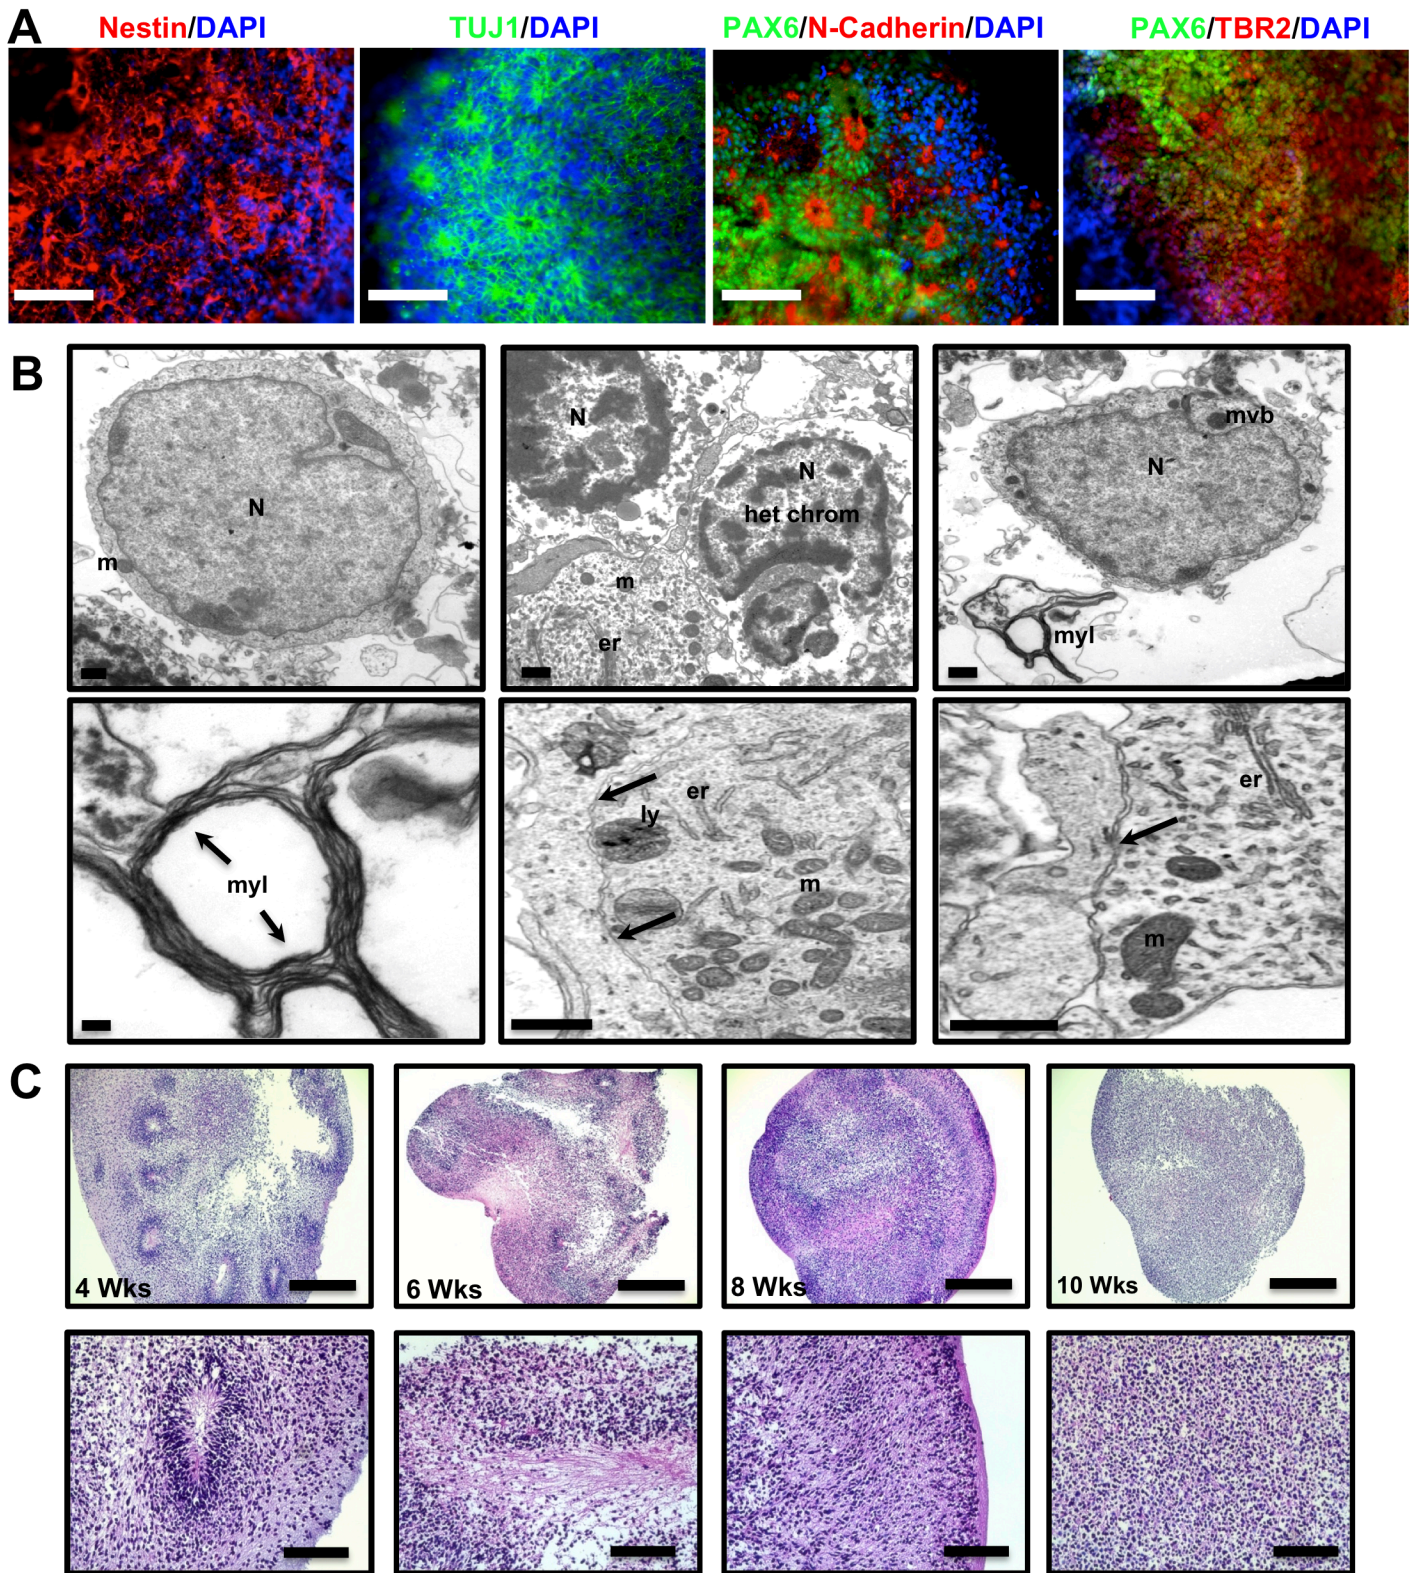

**Figure S2: Cerebral Organoids Express Markers for Specific Stages of Neural Development and Demonstrate Myelinated Axons, Dendrodendritic Synapses, Neurons and Glial Cells, Related to Figure 1.** (A) Immunofluorescence staining of Nestin, TUJ1, PAX6, N-Cadherin, and TBR2; scale bar, 200  $\mu$ m. (B) Electron microscopy demonstrates neurons (top left; top right), glial cells (top middle, identified by heterochromatin), myelin (top right; bottom left), and dendrodendritic synapses (black arrows indicate synapses between two dendrites; bottom center and right); N, nucleus; m, mitochondria; er, endoplasmic reticulum, mvb, multi-vesicular body; myl, myelin; ly, lysosome; L, Lipid Droplet; G, Golgi apparatus; scale bars for top panels, 500 nm; scale bars for bottom panel, 100 nm (left) and 500 nm (center and right). (C) Chronological maturation of cerebral organoids; scale bars (top panel), 400  $\mu$ m; scale bars (bottom panel), 100  $\mu$ m; n=4-6 organoids for all experiments.



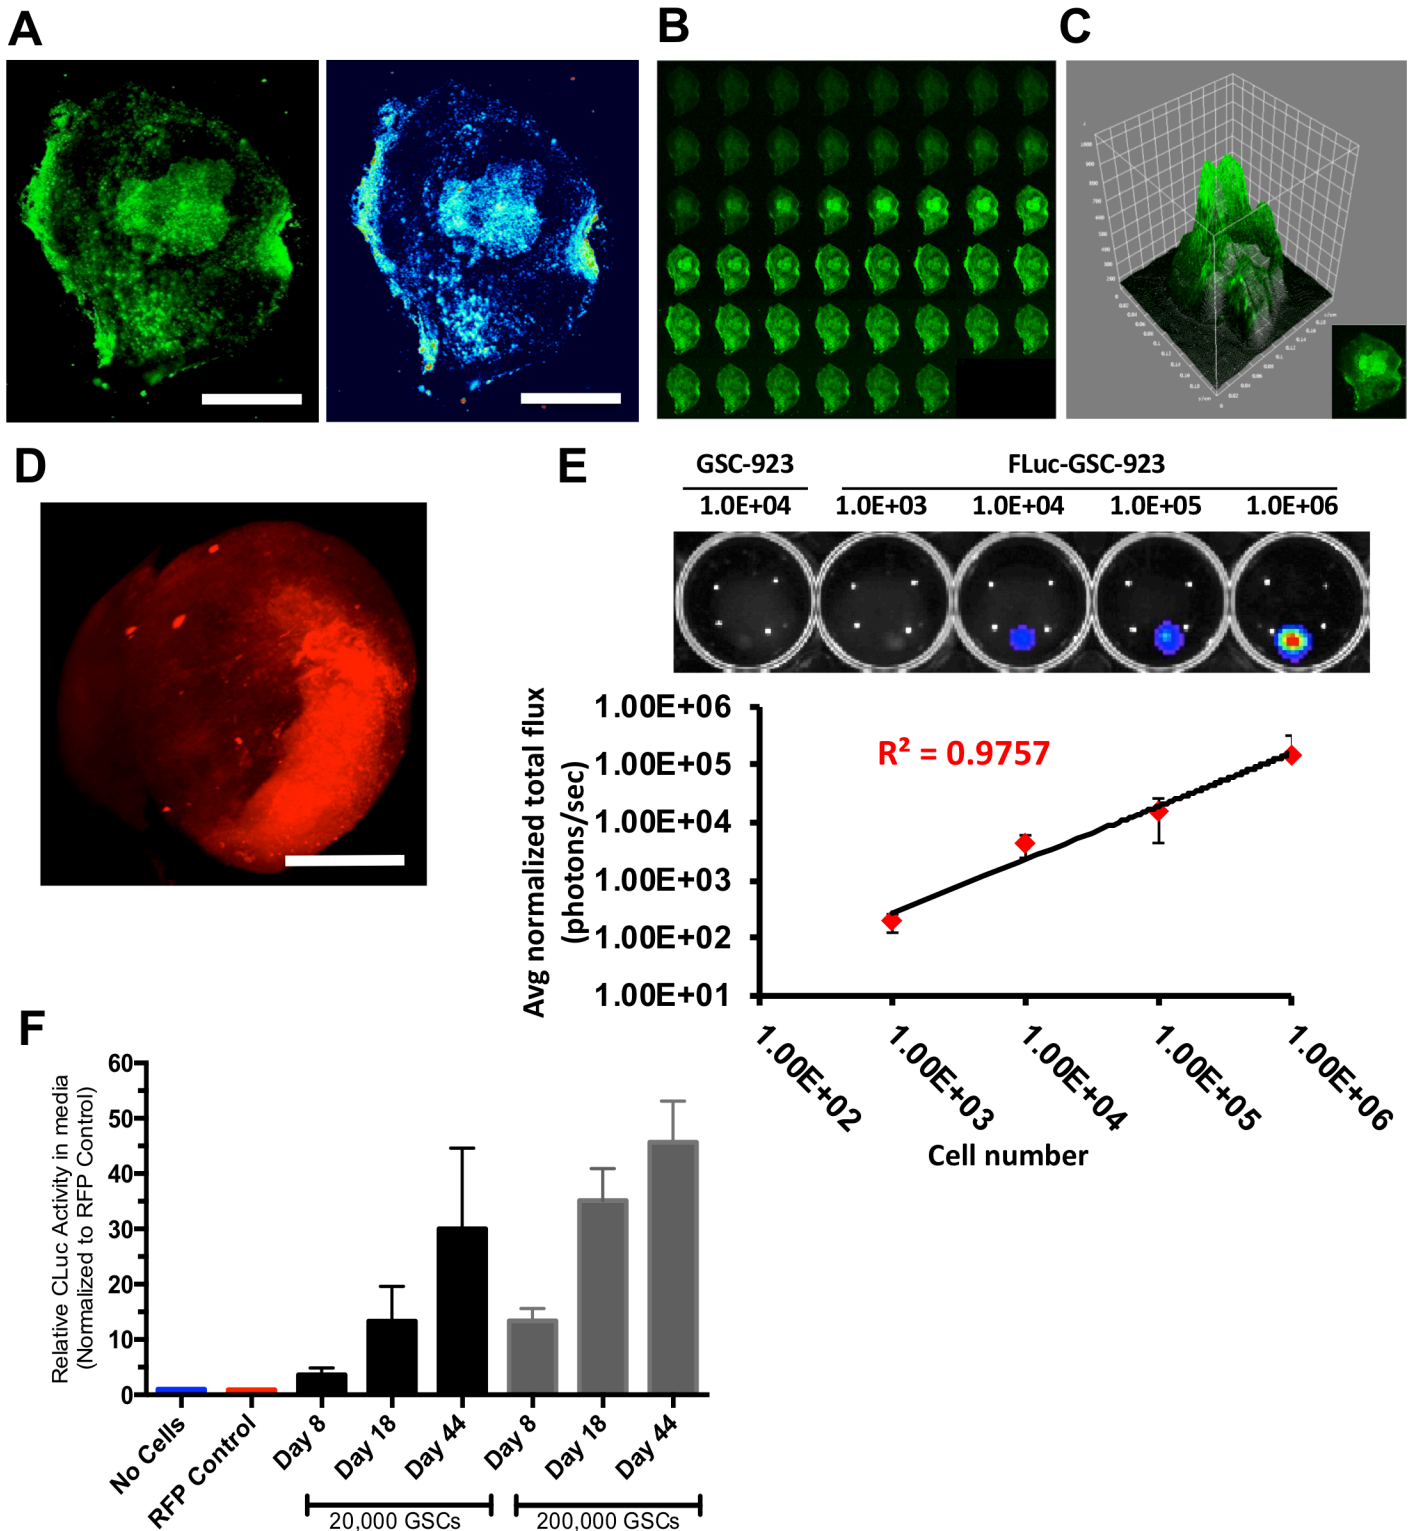

**Figure S3: GLICO Tumors are Detectable by Fluorescence and Luciferase-based Imaging, Related to Figure 1. (A)** Two-photon volumetric analysis of pixel intensity in GLICO tumor from GFP-positive 923 GSCs at Day 10; scale bars, 400  $\mu\text{m}$ ;  $n=4-6$  organoids. **(B)** Multi-photon optical Z-stack image analysis of entire GLICO tumor from GFP-positive 923 GSCs at Day 10;  $n=4-6$  organoids. **(C)** 3D topography of 923 GLICO tumor at Day 10;  $n=4-6$  organoids. **(D)** Light sheet microscopy of GLICO tumor from GFP-positive 923 GSCs at Day 14 (pseudocolored red); scale bar, 500  $\mu\text{m}$ ;  $n=1$  organoid. **(E)** Cell density-dependent increase in bioluminescence signal of GLICO tumors from 923 GSCs that stably express firefly luciferase; data were collected from three independent experiments;  $n=3-5$  organoids per group. **(F)** Relative secreted luciferase activity in cerebral organoids that were co-cultured with either 20,000 or 200,000 827 GSCs that stably express a secreted *Cypridina* luciferase. Data were collected in triplicate from three independent experiments;  $n=3-5$  organoids per group.



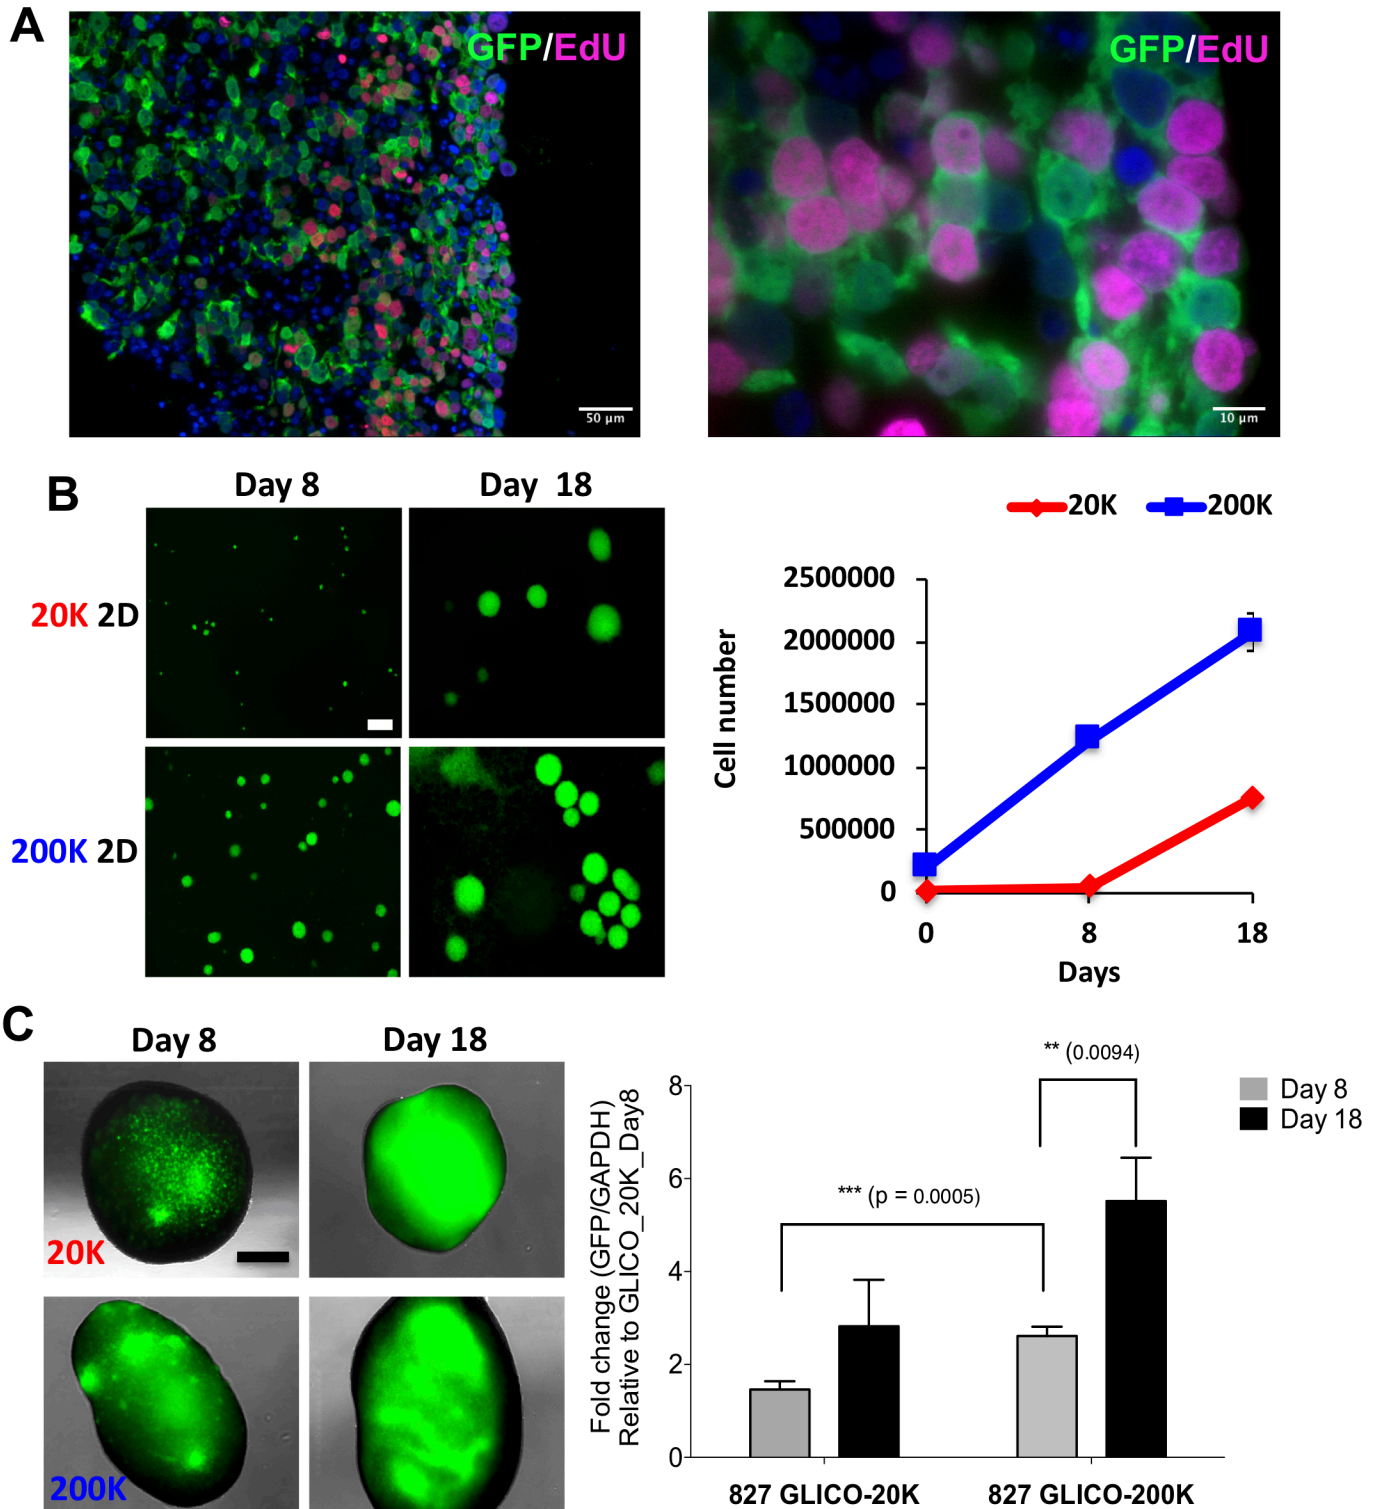

**Figure S4: GSCs Proliferate within Cerebral Organoids in a Time-Dependent Manner, Related to Figure 1.** (A) GFP-expressing 923 GLICO tumors were grown for 2 weeks and labeled with 5-ethynyl-2'-deoxyuridine (EdU) for 48 hrs. Paraffin-sections of these labeled GLICOs were co-stained for GFP (green) and EdU (magenta);  $n=3$  organoids; scale bar, 50  $\mu\text{m}$  (left) and 10  $\mu\text{m}$  (right). Shown are representative images of proliferating tumor cells (GFP+/EdU+) within the organoid. (B) GFP-expressing 827 GSCs were seeded in 2D at either 20,000 or 200,000 cells per well (6-well plate). Cells were counted after 8 or 18 days of growth. Shown are representative 2D images (left) and the corresponding quantification of live cell number (right) at Day 8 and Day 18; scale bar, 400  $\mu\text{m}$ ; cells were plated in triplicate. (C) 20,000 or 200,000 GFP-expressing 827 GSCs were co-cultured with H1 cerebral organoids. GLICO tumors were harvested at 8 and 18 days post-co-culture and assessed for GFP expression by quantitative PCR (qPCR). Shown are representative images of 827 GLICOs (left) and quantification of GFP expression at corresponding time points (right); scale bar, 500  $\mu\text{m}$ ;  $n=3-5$  organoids per group.

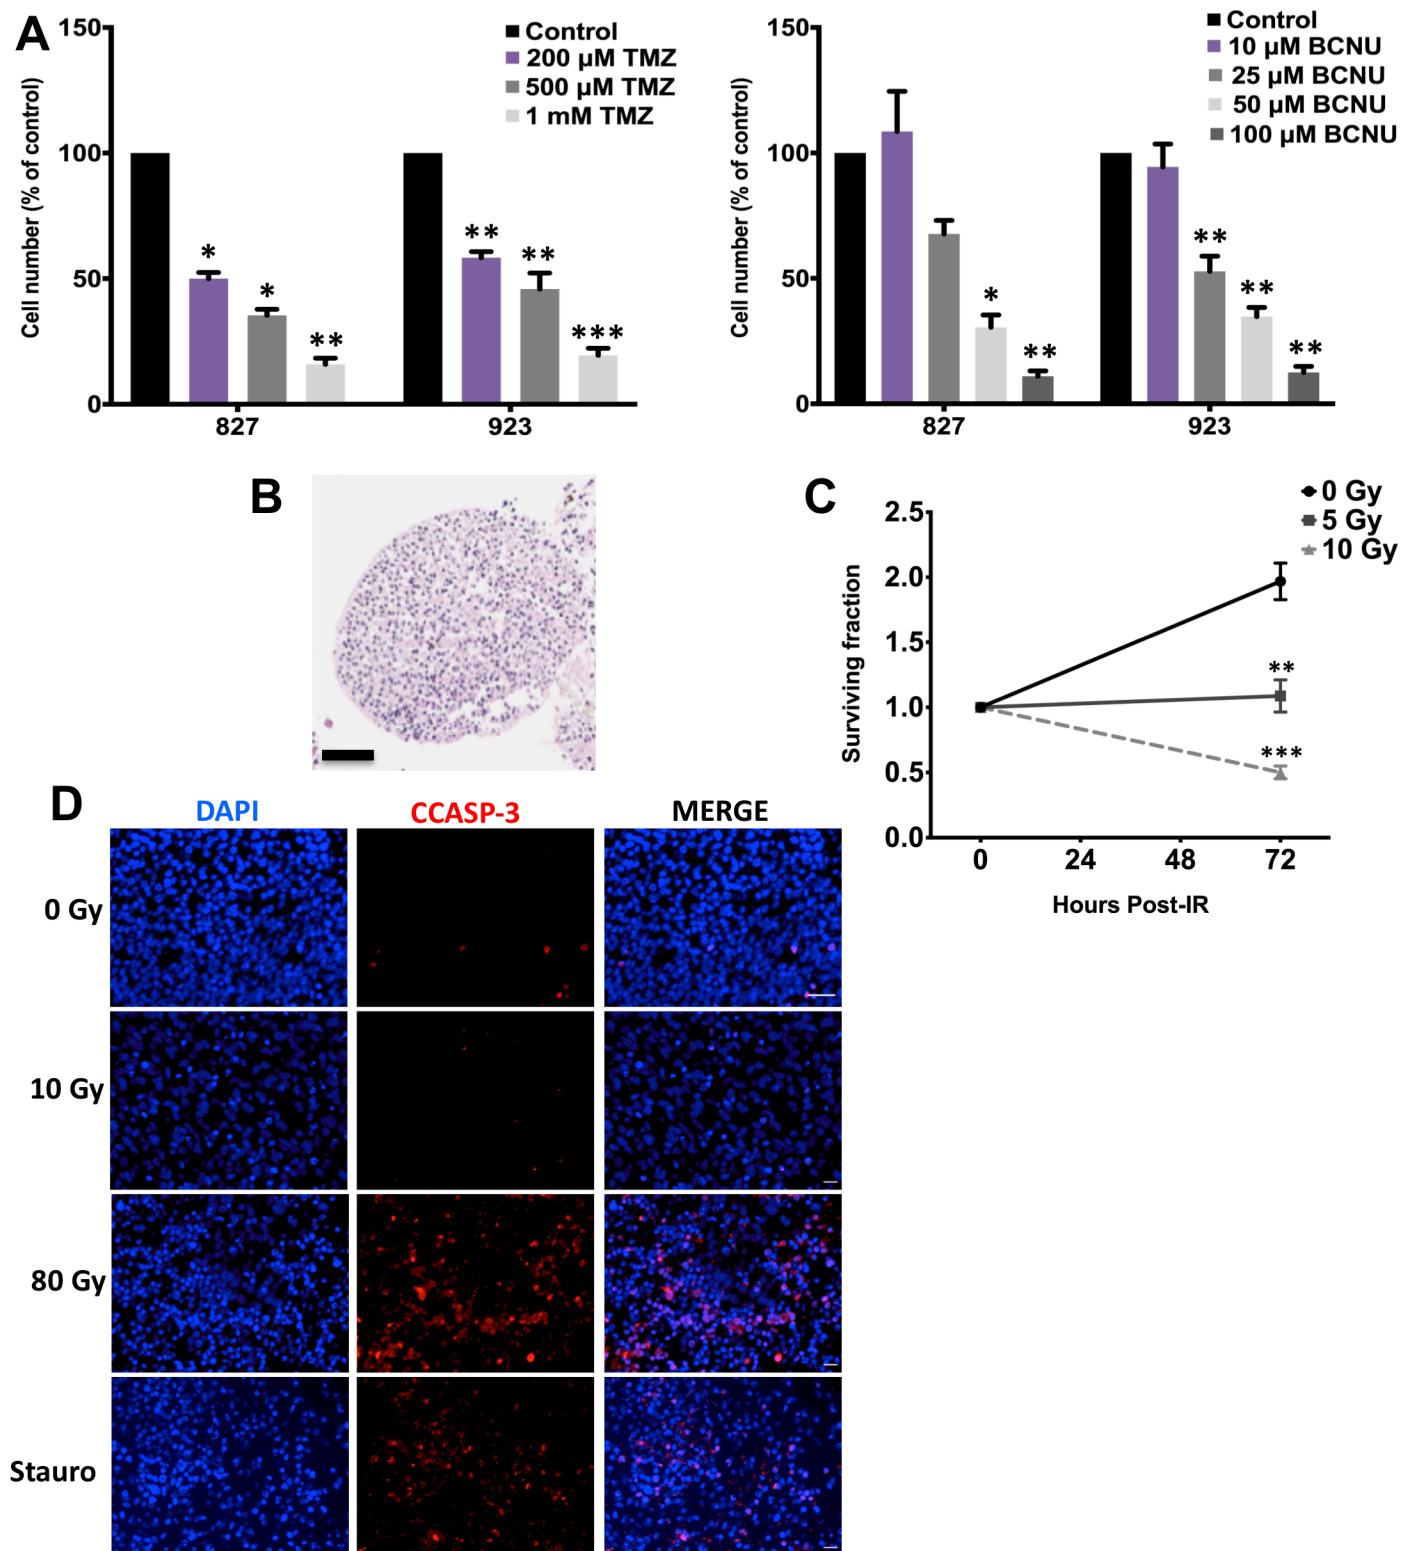

**Figure S5: 2D Cultures of GSCs are Significantly More Sensitive to Chemotherapeutic Agents and Ionizing Radiation than their Corresponding GLICO Tumors, Related to Figure 3.** (A) Shown is TMZ-(left) or BCNU-(right) induced cytotoxicity in 2D cultures of 827 or 923 GSCs; cells were plated in triplicate; in comparison to control, \* $p$ <0.05; \*\* $p$ <0.01; \*\*\* $p$ <0.001. (B) H&E immunohistochemical analysis of normal cerebral organoid treated with 1 mM TMZ for 7 days; scale bar, 100  $\mu$ m;  $n$ =3-5 organoids. (C) Shown is the cell viability of 2D 923 GSCs at 72 hours post-treatment with a single dose of 0, 5, or 10 Gy of ionizing radiation (IR); in comparison to 0 Gy, \*\* $p$ <0.01; \*\*\* $p$ <0.001. (D) Normal organoids were irradiated with 0, 10, or 80 Gy (positive control). Immunofluorescence staining for cleaved caspase-3 (CCASP-3) was used at 72 hrs post-IR to assess apoptosis. Incubation with staurosporine (stauro, 1  $\mu$ M) for 72 hours was used as an additional positive control for CCASP-3. Shown are representative images; scale bar, 40  $\mu$ m;  $n$ =4 organoids per group.



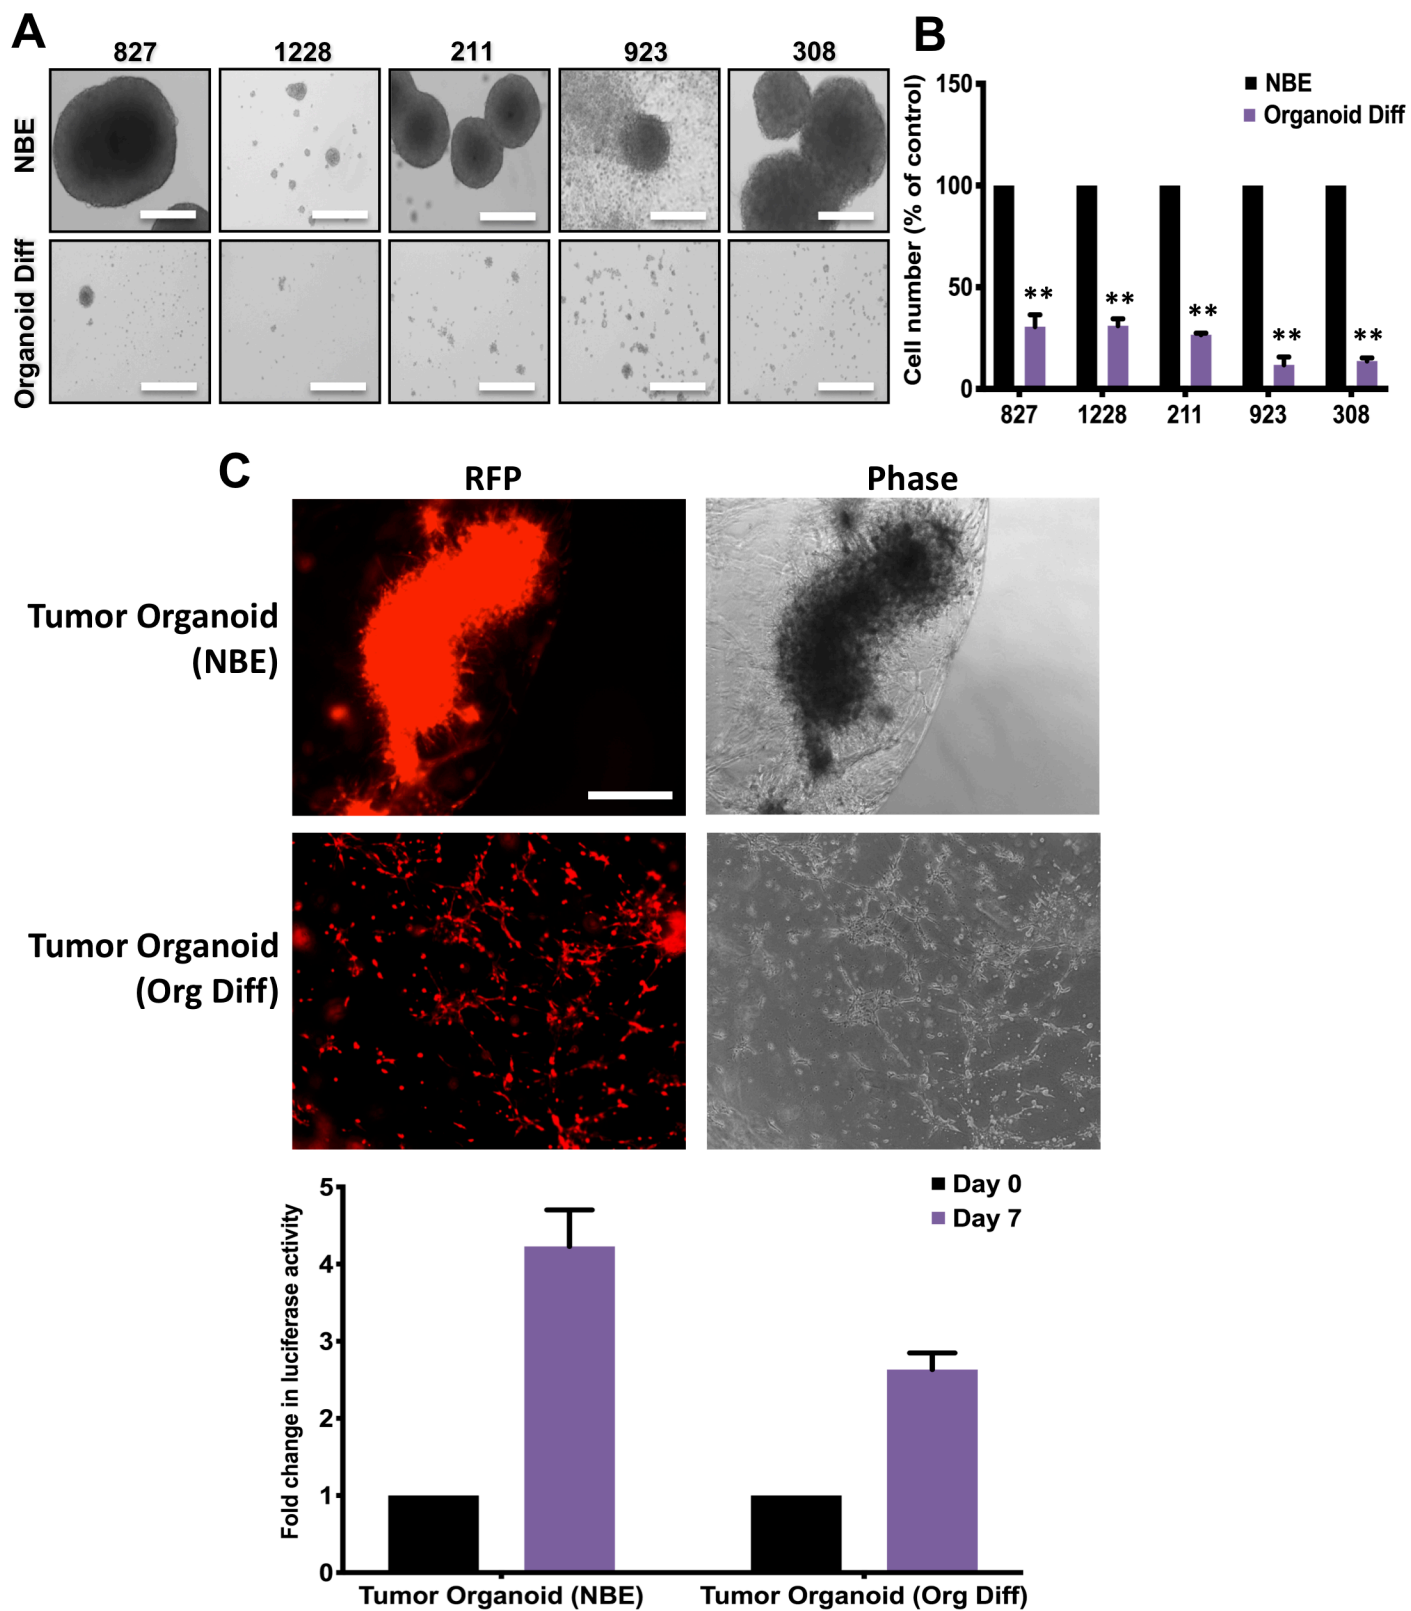

**Figure S6: GSC Survival is Attenuated in Organoid Differentiation Medium, Related to Figure 1.** (A) Representative micrographs of the proliferation of five GSC 2D cultures in NBE vs. Organoid Differentiation Medium; scale bar, 400  $\mu$ m. (B) Bar graph of the average live cell number at Day 7 from three independent experiments; \*\* $p < 0.01$ . (C) Shown are representative images (top) of tumor organoids generated from culturing 923 luciferase-expressing GSCs in Matrigel. Tumor organoids were cultured in either NBE or Organoid Differentiation Medium for 7 days. The bar graph reveals secreted luciferase in each set of conditions 7 days after growth; scale bar, 400  $\mu$ m;  $n = 4$  organoids.

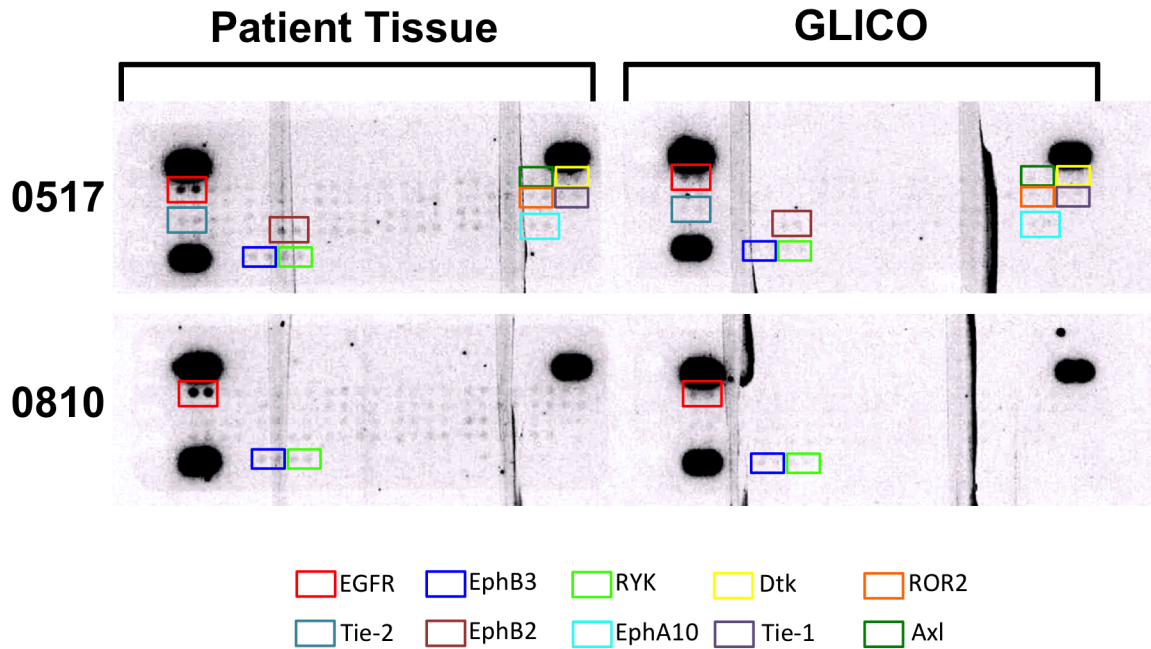

**Figure S7: GLICO Tumors Reflect Signaling Networks Found within the Parental Tumor, Related to Figure 1.** Phospho-RTK arrays of patient tumor tissue and corresponding GLICOs for GSC lines 0517 and 0810. 50  $\mu$ g of total protein was used for each array; epidermal growth factor receptor (EGFR), ephrin type-B receptor 2 (EphB2), ephrin type-B receptor 3 (EphB3), ephrin receptor A 10 (EphA10), tyrosine kinase with immunoglobulin-like and EGF-like domain 1 (Tie-1), TEK receptor tyrosine kinase (Tie-2), tyrosine-protein kinase Dtk (Dtk), Axl receptor tyrosine kinase (Axl), related to receptor tyrosine kinase (RYK), and receptor tyrosine kinase-like orphan receptor 2 (ROR2).
